# Supplementary material for: Microglia reactivity entails microtubule remodeling from acentrosomal to centrosomal arrays
Source: bioRxiv or medRxiv preprint supplement (doi:10.1101/2022.02.21.481355), 2022-04-27
Supplement: Supplementary file [file media-1.pdf]

**A**

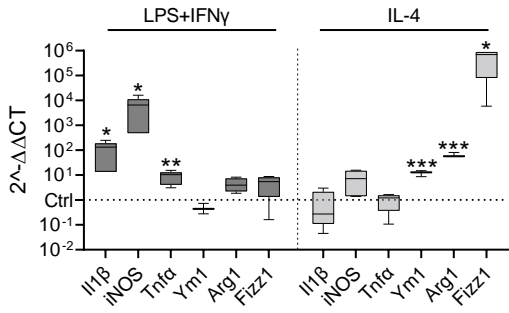

**B**

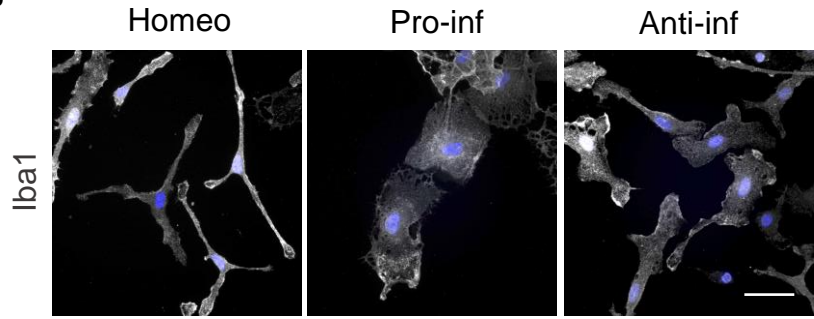

**C**

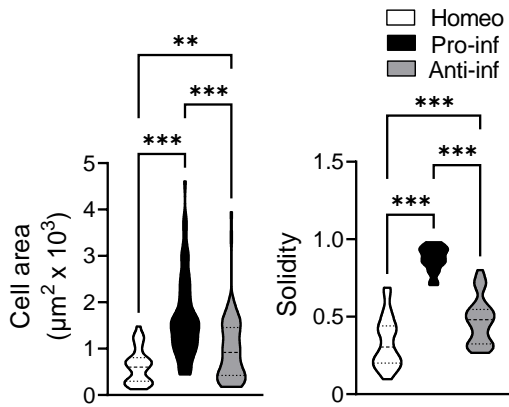

**D**

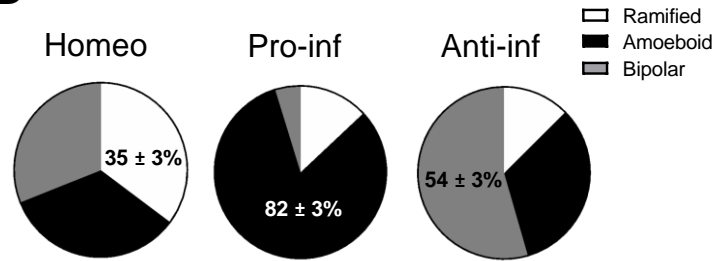

**F**

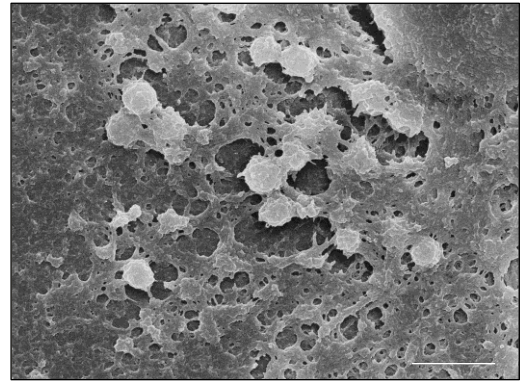

**E**

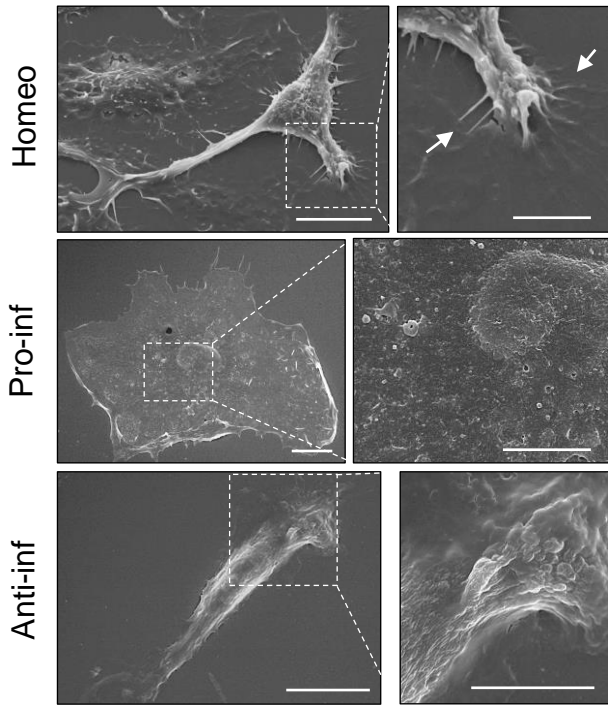

**G**

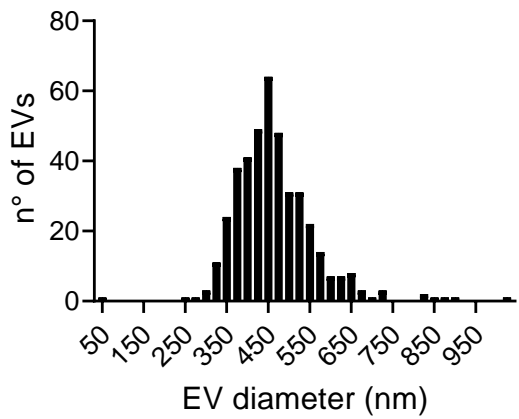

**H**

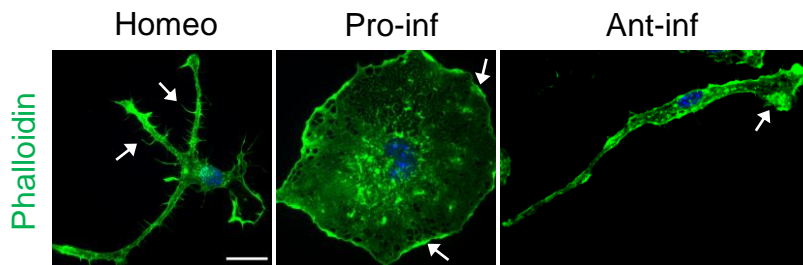

**Fig. S1. Molecular and morphological characterization of homeostatic, pro-inflammatory and anti-inflammatory primary microglia**

**(A)** RT-qPCR reveals increased expression of pro-inflammatory (*Il1b*, *iNOS*, *Tnfa*) and anti-inflammatory genes (*Ym1*, *Arg1*, *Fizz1*) upon LPS-IFN $\gamma$  or IL-4 challenge, respectively. Gene expression is normalized to the housekeeping gene *Gapdh*, n = 4 independent cultures. Box plots indicate the median, 25th, and 75th percentiles; whiskers show the minimum and maximum. \*\*\* p <0.001; \*\* p <0.01; \*p <0.05, Student's t-test. **(B)** Representative images showing Iba1 immunostaining (gray) of microglia in CTRL (Homeo) condition and following LPS-IFN $\gamma$  (Pro-inf) or IL4 (Anti-inf) treatment (Scale bar: 20  $\mu$ m. Hoechst for nuclei visualization, blue). **(C)** Violin plots showing cell surface area (*left*) and solidity coefficient (*right*) related to Homeo (white), Pro-inf (black) and Anti-inf (gray) cells (n = 70 cells for each condition, from 3 independent experiments. \*\*\* p <0.001; \*\*p <0.01. Kruskal-Wallis - Dunn's multiple comparisons test for cell area, *left*; One-way ANOVA - Tukey's multiple comparison test for solidity, *right*). **(D)** Pie charts illustrating the distribution of cell morphology in Homeo, Pro-inf and Anti-inf conditions. Ramified cells are enriched in Homeo (35  $\pm$  3%), amoeboid in Pro-inf (82  $\pm$  3%) and bipolar in Anti-inf (54  $\pm$  3%), n = 3 independent experiments. **(E)** Representative scanning electron micrographs of microglia cells in Homeo (*top*), Pro-inf (*middle*) and Anti-inf (*bottom*) conditions. Ramified cells (Homeo) show filopodia extensions as indicated by arrows, amoeboid cells (Pro-inf) exhibit numerous extracellular vesicles on the cell surface, while bipolar cells (Anti-inf) are characterized by extensive membrane ruffling on the cell surface and leading edge. Scale bar: 10  $\mu$ m; zoom, 5  $\mu$ m. **(F)** Scanning electron micrographs showing extracellular vesicles on the Pro-inf cell surface at higher magnification. Scale bar: 2  $\mu$ m. **(G)** Distribution of EVs size measured on amoeboid cell surface. n = 22 cells. **(H)** Representative confocal images of microglia labelled with Alexa Fluor 488-conjugated phalloidin (green). Ramified cells (Homeo) exhibit filopodia like structures (as indicated by arrows) while amoeboid (Pro-inf) and bipolar cells (Anti-inf) are characterized by membrane ruffles along cell borders and at lamellipodia (as indicated by arrows). Scale bar: 25  $\mu$ m. Hoechst for nuclei visualization, blue.

**A**

|          | Tyr+/EB+ comets | Tyr+/EB- comets | TOT |
|----------|-----------------|-----------------|-----|
| Homeo    | 96              | 57              | 153 |
| Pro-inf  | 361             | 48              | 409 |
| Anti-inf | 146             | 33              | 179 |
| TOT      | 603             | 138             | 741 |

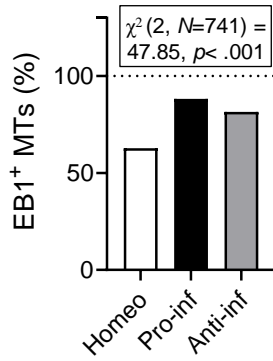

**B**

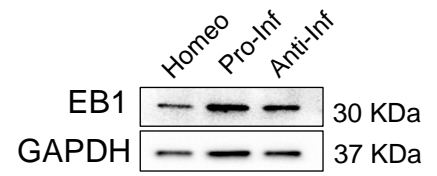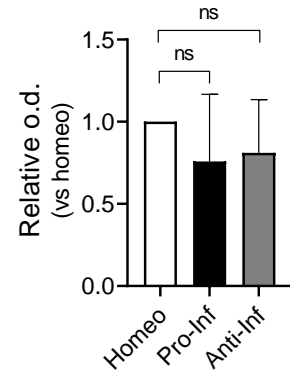

**C**

|          | Retrograde comets | Anterograde comets | TOT |
|----------|-------------------|--------------------|-----|
| Homeo    | 33                | 108                | 141 |
| Pro-inf  | 1                 | 187                | 188 |
| Anti-inf | 32                | 224                | 256 |
| TOT      | 66                | 519                | 585 |

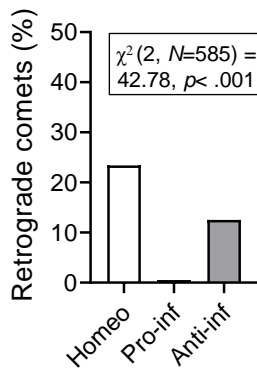

**D**

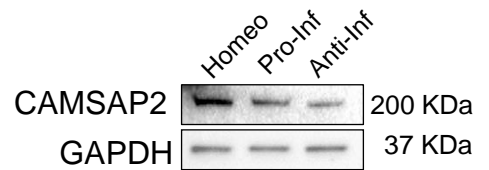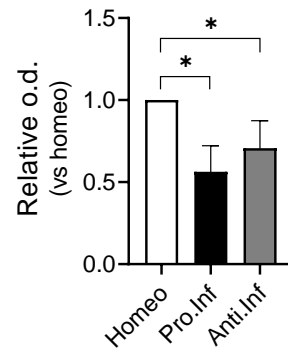

**Fig. S2. Analysis of EB1 and CAMSAP2 expression in homeostatic, pro-inflammatory and anti-inflammatory microglia**

**(A)** Contingency analysis of EB1 and tyrosinated  $\alpha$ -tubulin (Tyr tub) co-staining in homeostatic (Homeo), pro-inflammatory (Pro-inf) and anti-inflammatory (Anti-inf) microglia: percentage of double positive staining are reported in the bar chart,  $\chi^2$  parameters are reported in the insert. **(B)** *Bottom*: bar chart reporting the amount of EB1 protein level in microglia phenotypes; *top*: representative immunoblot of EB1. Values are expressed as median  $\pm$  interquartile range from 4 independent experiments.  $p=0.31$ , Mann Whitney test. **(C)** Contingency analysis of comets in Homeo, Pro-inf and Anti-inf microglia: percentage of retrograde comets are reported in the bar chart,  $\chi^2$  parameters are reported in the insert. **(D)** *Bottom*: bar chart reporting the amount of CAMSAP2 protein level in microglia phenotypes; *top*: representative immunoblot of CAMSAP2. Values are expressed as median  $\pm$  interquartile range from 4 independent experiments. \*  $p < 0.05$ , Mann Whitney test.

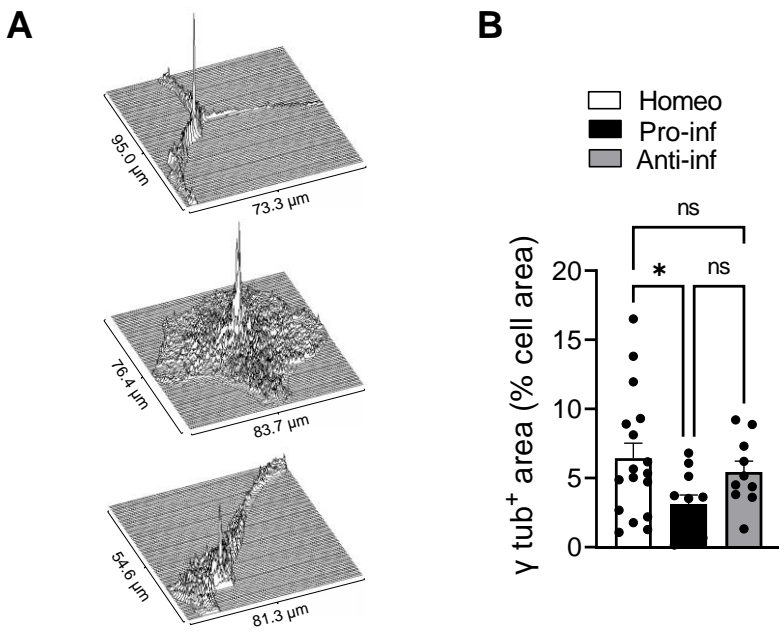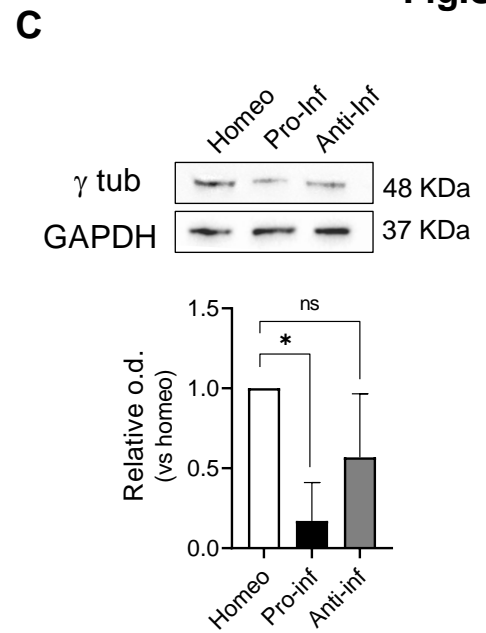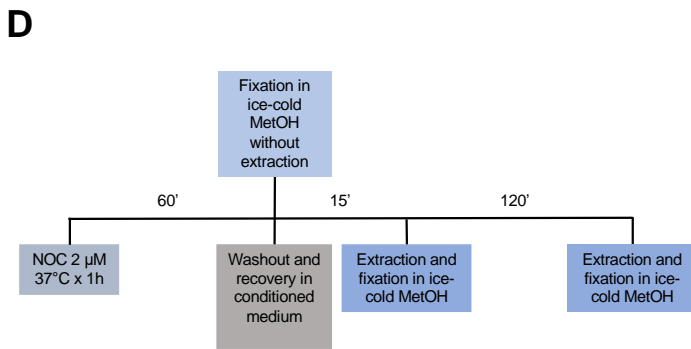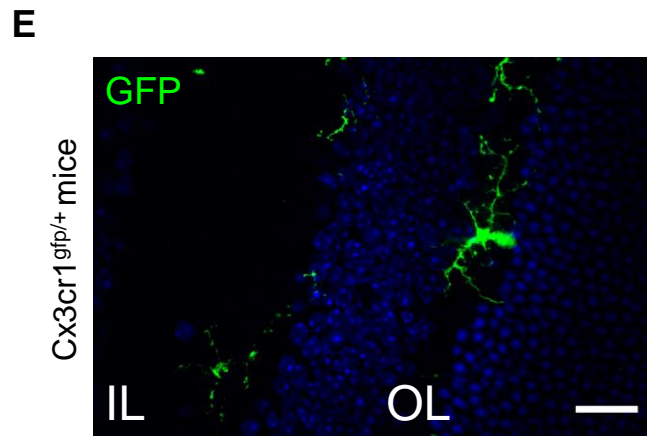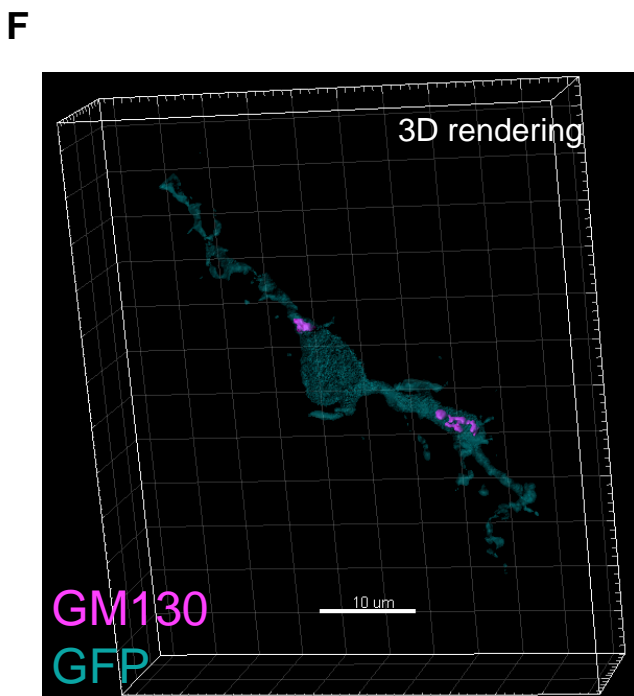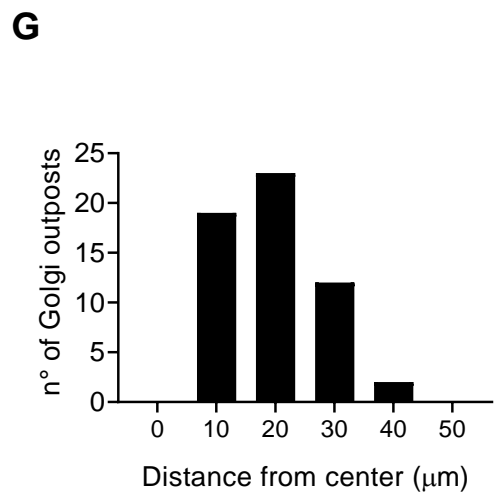

**Fig. S3. Molecular, morphological and functional characterization of microglia non-centrosomal MTs nucleation in primary cultures and in retinal slices**

**(A)** Representative volumetric rendering of  $\gamma$ -tubulin ( $\gamma$  tub) signal intensity of homeostatic (Homeo), pro-inflammatory (Pro-inf) and anti-inflammatory (Anti-inf) microglia. **(B)** Scatter dot plot showing analysis of  $\gamma$  tub signal over the cell area in Homeo, Pro-inf and Anti-inf microglia. Values are expressed as mean  $\pm$  SEM (Homeo n = 17, Pro-inf n = 11 and Anti-inf n = 10 cells from 4 independent experiments). \* p <0.05, Kruskal-Wallis test - Dunn's multiple comparison test. **(C)** Representative immunoblot of total  $\gamma$  tub in Homeo, Pro-inf and Anti-inf microglia (*top*); bar chart showing the quantification of  $\gamma$  tub protein levels (*bottom*). Values are expressed as median  $\pm$  interquartile range from 4 independent experiments. \* p <0.05, Mann Whitney test. **(D)** Treatment timeline of Nocodazole wash out assay. **(E)** Representative images of retinal slices (50  $\mu$ m thickness) from control cx3cr1<sup>gfp/+</sup> mice stained with Hoechst for nuclei visualization (blue), showing retinal cell layers (IL inner layer, OL outer layer). Scale bar: 20  $\mu$ m. **(F)** 3D rendering of sample retinal GFP+ microglia (cyan) stained for GM130 (magenta). Scale bar: 10  $\mu$ m. **(G)** Bar chart reporting the number of Golgi outposts at increasing distance from the center of cell body in retinal microglia.

**A**

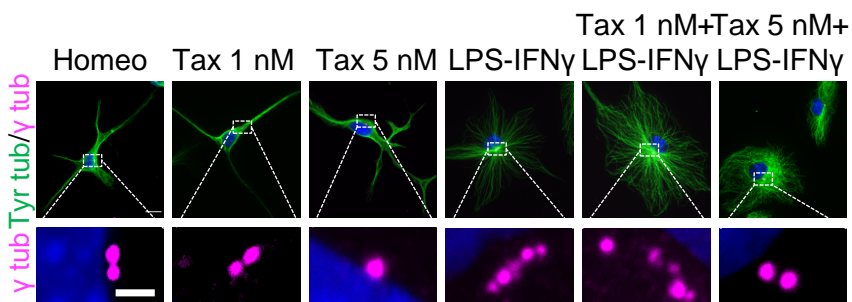

**B**

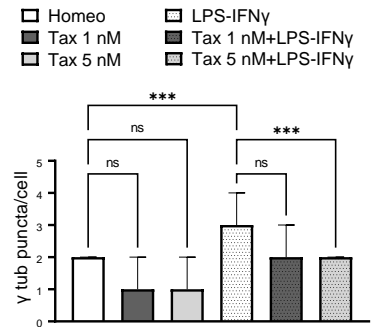

**C**

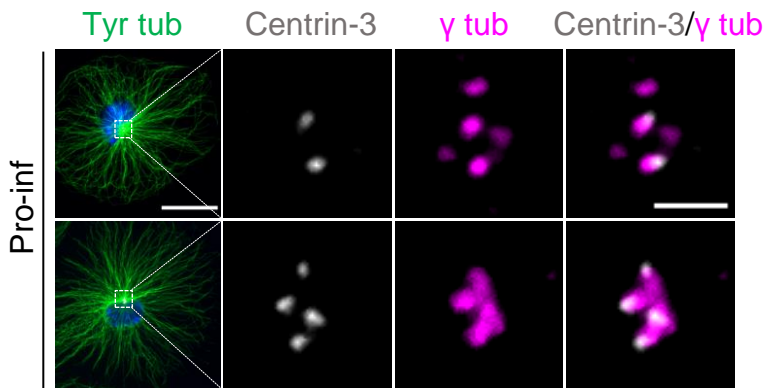

**D**

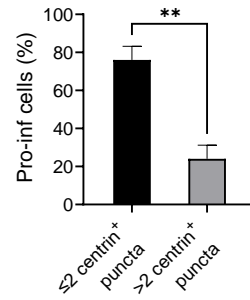

**E**

| Cell cycle | Homeo  | Pro-Inf |
|------------|--------|---------|
| G1         | 83 ± 2 | 75 ± 4  |
| S          | 8 ± 1  | 15 ± 2  |
| G2/M       | 4 ± 1  | 8 ± 2   |

**F**

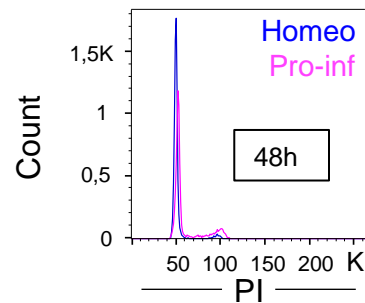

**G**

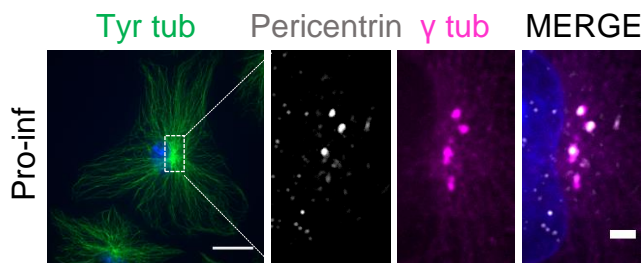

**H**

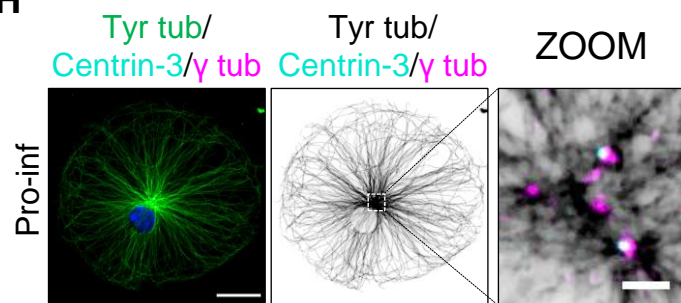

**I**

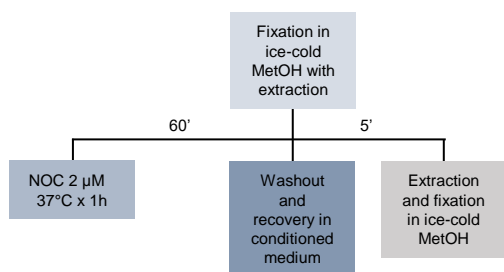

**J**

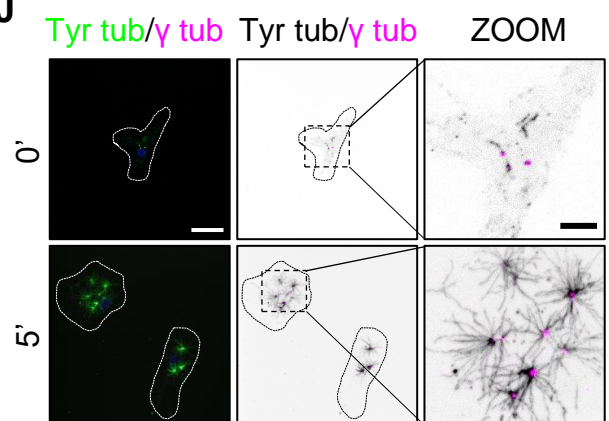

#### **Fig. S4. Analysis of pericentriolar material maturation during microglia pro-inflammatory activation**

**(A)** Representative images of immunostaining of tyrosinated (Tyr) tub (green) and  $\gamma$ -tubulin ( $\gamma$  tub) (magenta) in homeostatic (Homeo), Taxol 1 nM treated (Tax 1 nM), Taxol 5 nM treated (Tax 5 nM), pro-inflammatory (LPS-IFN $\gamma$ ), Taxol 1 nM+LPS-IFN $\gamma$  treated (Tax 1 nM+LPS-IFN $\gamma$ ) and Taxol 5 nM+LPS-IFN $\gamma$  treated (Tax 5 nM+LPS-IFN $\gamma$ ) microglia (Top, Scale bar: 10  $\mu$ m; zoom, 2  $\mu$ m. Hoechst for nuclei visualization, blue). **(B)** Bar chart reporting the number of  $\gamma$  tub puncta per cell in homeostatic (Homeo), Taxol 1 nM treated (Tax 1 nM), Taxol 5 nM treated (Tax 5nM), pro-inflammatory (LPS-IFN $\gamma$ ), Taxol 1 nM+LPS-IFN $\gamma$  treated (Tax 1 nM+LPS-IFN $\gamma$ ) and Taxol 5 nM+LPS-IFN $\gamma$  treated (Tax 5nM+LPS-IFN $\gamma$ ) microglia. Values are expressed as median  $\pm$  interquartile range from 3 independent experiments. \*\*\*p <0.001. Kruskal-Wallis - Dunn's multiple comparisons test. **(C)** Representative images showing Tyr tub (green), centrin-3 (gray) and  $\gamma$  tub (magenta) immunolabeling and co-localization of centrin-3 (gray) and  $\gamma$  tub (magenta) in pro-inflammatory (Pro-inf) microglia. Scale bar: 20  $\mu$ m; zoom, 2  $\mu$ m. Hoechst for nuclei visualization, blue. **(D)** Bar graph reporting the percentage of Pro-inf cells displaying  $\leq 2$  or  $> 2$  centrin $^+$  puncta. Values are expressed as mean  $\pm$  SEM of n = 52 cells from 3 independent experiments. \*\*p <0.01, Student's t-test. **(E)** Table reporting the percentage of cells in G1, S and G2/M phases from Homeo and Pro-inf microglia cultures, stained with propidium iodide (PI) and analyzed by flow cytometry. Percentages indicate the relative enrichment in cell population, values are expressed as mean  $\pm$  SEM from three independent experiments. **(F)** Representative histogram of cell cycle overlay of Homeo (blue line) and Pro-inf (magenta line) microglia. **(G)** Representative images showing Tyr tub (green), pericentrin (gray) and  $\gamma$  tub (magenta) immunolabeling in Pro-inf microglia. Scale bar: 20  $\mu$ m; zoom, 2  $\mu$ m. Hoechst for nuclei visualization, blue. **(H)** *Left:* representative image of Tyr tub (green), centrin-3 (cyan) and  $\gamma$  tub (magenta) immunolabeling in Pro-inf microglia. *Middle and right:* representative image showing Tyr tub (black, inverted LUT), centrin-3 (cyan) and  $\gamma$  tub (magenta) immunolabeling in Pro-inf microglia. Out of focus blur was removed using "remove haze" filter in Metamorph Software to highlight the asters. Scale bar: 20  $\mu$ m; zoom, 2  $\mu$ m. Hoechst for nuclei visualization, blue. **(I)** Treatment timeline of Nocodazole wash out assay. **(J)** Representative confocal images of the time course of the MT re-nucleation assay after nocodazole washout in Pro-inf microglia stained for Tyr tub (green) and  $\gamma$  tub (magenta). Scale bar: 20  $\mu$ m; zoom: 5  $\mu$ m. Hoechst for nuclei visualization, blue. Time 0' represents the MT depolymerizing effect of nocodazole in Pro-inf cells with free tubulin extraction.



A

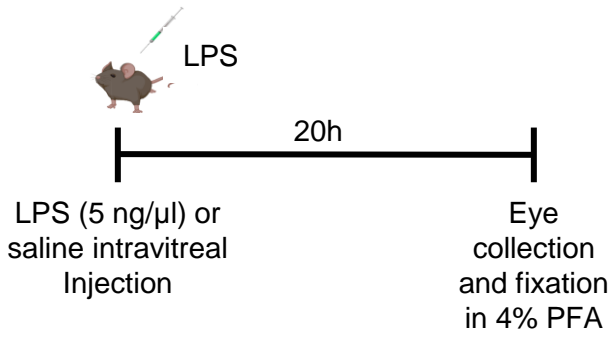

B

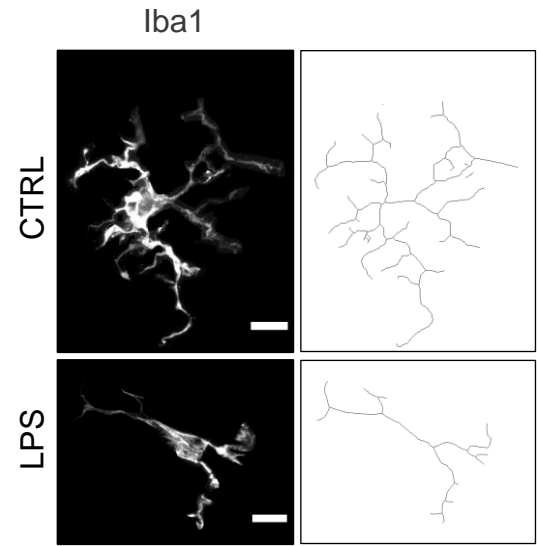

C

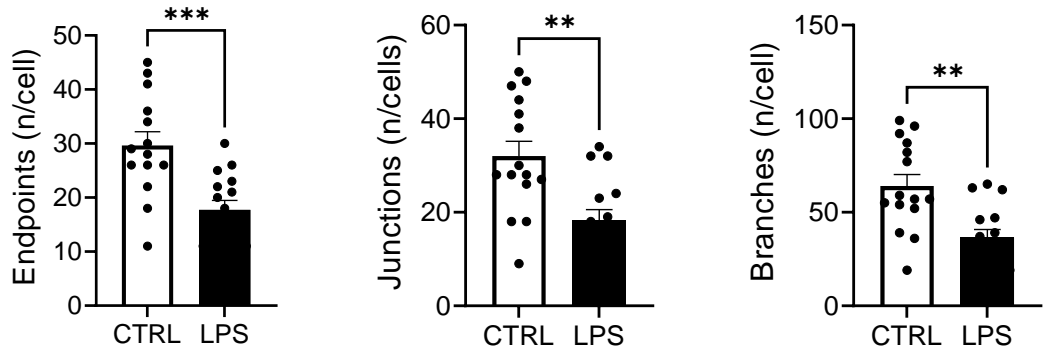

**Fig. S5. Characterization of *in vivo* microglia activation in the LPS-induced uveitis model**

**(A)** Schematic illustration of surgical procedure and tissue collection. **(B)** *Left*: representative immunofluorescence images of microglia (Iba1, gray) in retinal slices (50  $\mu$ m thickness) from CTRL (sham) and LPS treated mice. Scale bar: 10  $\mu$ m. *Right*: corresponding skeletonized images. **(C)** Scatter dot plots reporting microglia arborization parameters as endpoints (*left*), junctions (*middle*) and branches (*right*) obtained from skeleton analysis of retinal microglia from CTRL (sham) and LPS treated mice. Values are expressed as mean  $\pm$  SEM (CTRL, n = 14/3 cells/mice; LPS, n = 15/3 cells/mice; \*\*\* p <0.001, \*\* p <0.01; Student's t-test).

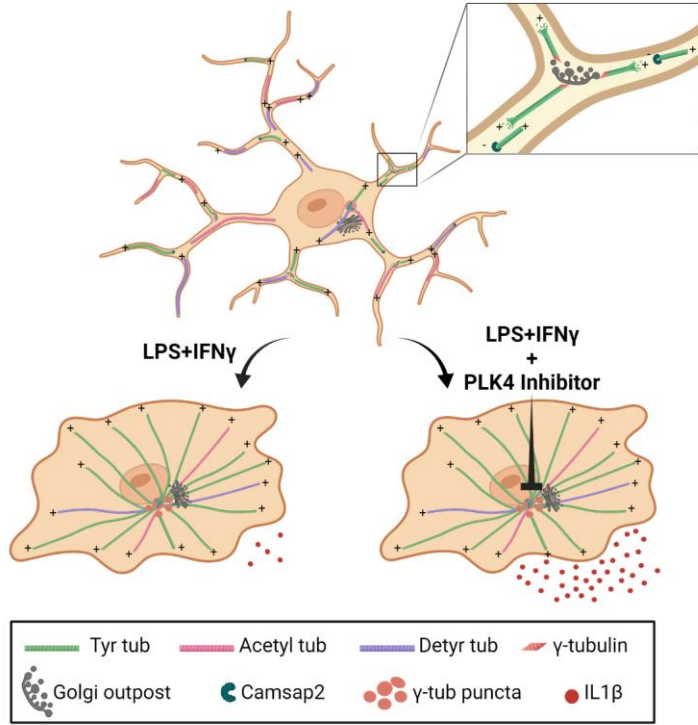

**Fig. S6. Graphical abstract to illustrate the main findings of this study.** Homeostatic microglia have stable MT arrays, while microglia reactivity increases MT dynamic behavior. In addition, homeostatic microglia have non-centrosomal MTs with mixed polarity similar to the architecture of highly specialized cells such as neurons and oligodendrocytes. Pro-inflammatory microglia reactivity results in restricted g-tubulin localization to puncta around the centrosome because of *de novo* pericentriolar material (PCM) maturation. Inhibition of PCM maturation by Polo-like Kinase 4 (PLK4) in pro-inflammatory microglia stimulates IL-1b release.

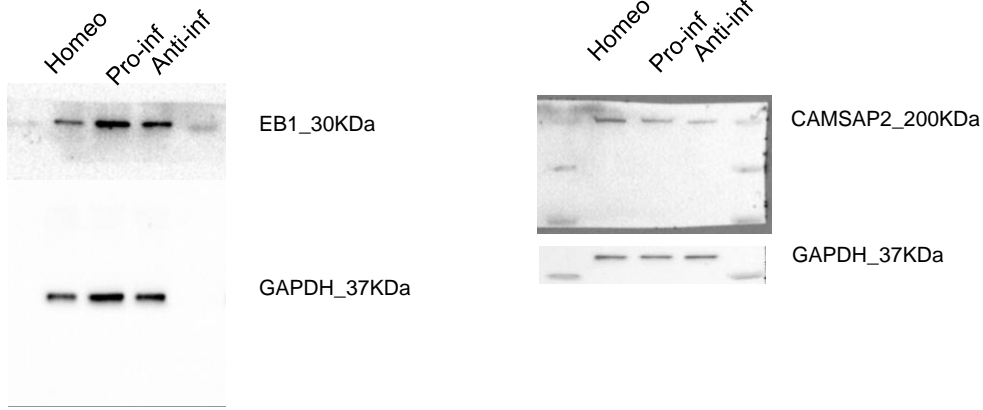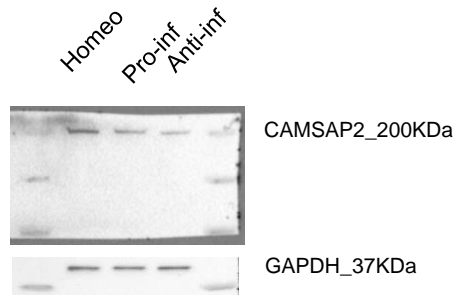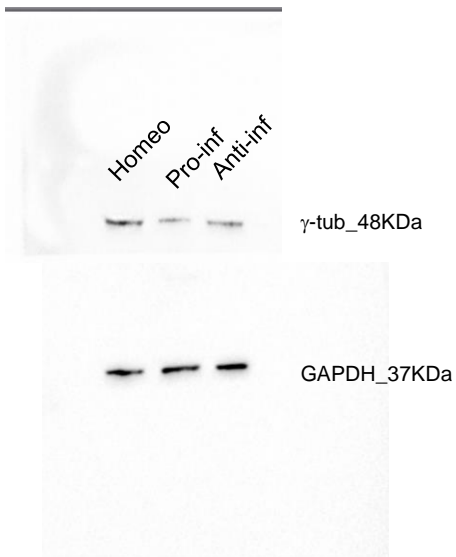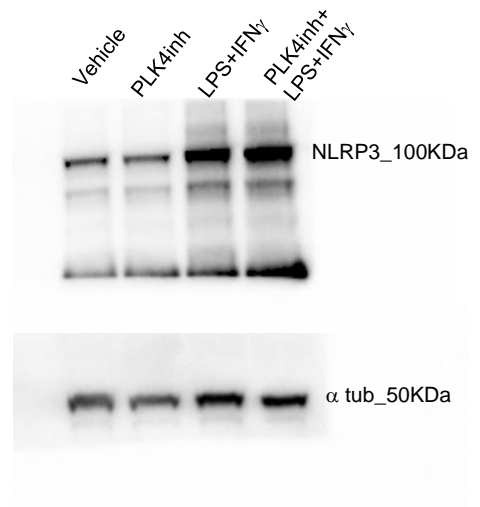

Fig S7: Original western blots
